# Supplementary material
Source: PubMed Central journal article supplement (PMC10357356)
Supplement: jamadermatol-e232029-s001.pdf [file jamadermatol-e232029-s001.pdf]

## Supplemental Online Content

Gjersvik P, Falk RS, Roscher I, et al. Rates of second tumor, metastasis, and death from cutaneous squamous cell carcinoma in patients with and without transplant-associated immunosuppression. *JAMA Dermatol*. Published online July 19, 2023. doi:10.1001/jamadermatol.2023.2029

**eTable.** Secondary Analyses Restricted to Organ Transplant Recipients (OTRs) and Non-OTRs Diagnosed With Cutaneous Squamous Cell Carcinoma (cSCC) in the Period 1968-2012

This supplemental material has been provided by the authors to give readers additional information about their work.

**eTable. Secondary Analyses Restricted to Organ Transplant Recipients (OTRs) and Non-OTR Patients Diagnosed With Cutaneous Squamous Cell Carcinoma (cSCC) in the Period 1968-2012**

|                                                 | Second cSCC      |                     | Metastasis       |                  | Death from cSCC  |                |
|-------------------------------------------------|------------------|---------------------|------------------|------------------|------------------|----------------|
|                                                 | Non-OTR patients | OTRs                | Non-OTR patients | OTRs             | Non-OTR patients | OTRs           |
| No. (%)                                         | 5,499            | 510                 | 606              | 24               | 399              | 31             |
| Person-years of follow-up                       | 217,005          | 2,091               | 259,329          | 5,994            | 261,717          | 6,046          |
| Rate per 1000 person-years (95% CI)             | 25.3 (24.7-26.0) | 243.8 (223.1-265.9) | 2.3 (2.2-2.5)    | 4.0 (2.6-6.0)    | 1.5 (1.4-1.7)    | 5.1 (3.5-7.3)  |
| Age-adjusted HR (95 %CI)                        | (reference)      | 5.5 (5.0-6.1)       | (reference)      | 1.29 (0.85-1.96) | (reference)      | 7.0 (4.8-10.4) |
| Multivariable <sup>a</sup> adjusted HR (95% CI) | (reference)      | 4.6 (4.2-5.1)       | (reference)      | 1.49 (0.97-2.26) | (reference)      | 5.2 (3.5-7.8)  |
| Cumulative incidence <sup>b</sup>               |                  |                     |                  |                  |                  |                |
| 5-year                                          | 17.1 (16.7-17.5) | 58.9 (55.6-62.3)    | 1.9 (1.7-2.0)    | 2.2 (1.5-3.3)    | 1.1 (1.0-1.2)    | 4.2 (3.0-6.1)  |
| 10-year                                         | 17.3 (16.9-17.7) | 58.9 (55.7-62.4)    | 1.9 (1.7-2.0)    | 2.2 (1.5-3.3)    | 1.1 (1.0-1.2)    | 4.3 (3.0-6.2)  |
| 20-year                                         | 18.0 (17.6-18.4) | 59.3 (56.1-62.8)    | 2.0 (1.8-2.1)    | 2.2 (1.5-3.4)    | 1.3 (1.2-1.5)    | 4.5 (3.1-6.4)  |

CI=confidence interval; HR=hazard ratio

<sup>a</sup> Age at diagnosis, sex and year of diagnosis of first cSCC

<sup>b</sup> Age-adjusted
