# Supplementary material
Source: PubMed Central journal article supplement (PMC10357356)
Supplement: jamadermatol-e232029-s002.pdf [file jamadermatol-e232029-s002.pdf]

## Data Sharing Statement

Gjersvik. Rates of Second Tumor, Metastasis, and Death From Cutaneous Squamous Cell Carcinoma in Patients With and Without Transplant-Associated Immunosuppression. *JAMA Dermatol*. Published July 19, 2023. doi:10.1001/jamadermatol.2023.2029

### Data

**Data available:** No

### Additional Information

**Explanation for why data not available:** Data sharing has not been approved by the Research Ethical Committee.
